# Supplementary material for: Facile, novel and efficient synthesis of new pyrazolo[3,4-b]pyridine products from condensation of pyrazole-5-amine derivatives and activated carbonyl groups
Source: Royal Society of Chemistry journal article supplement (doi:10.1039/c5ra16769h), 2015-01-01

## Supplementary Data

### Facile, novel and efficient synthesis of new pyrazolo[3,4-b]pyridine products from condensation of pyrazole-5-amine derivatives and activated carbonyl groups

Aseyeh Ghaedi<sup>a</sup>, Ghasem Rezanejade Bardajee<sup>\*a</sup>, Ahmad Mirshokrayi<sup>a</sup>, Mohammad Mahdavi<sup>b</sup>, Abbas Shafiee<sup>c</sup>, Tahmineh Akbarzadeh<sup>\*d</sup>

<sup>a</sup> Department of Chemistry, Payame Noor University (PNU), P.O. BOX, 19395-3697, Tehran, Iran

<sup>b</sup> Persian Medicine and Pharmacy Research Center, Tehran University of Medical Sciences, Tehran, Iran

<sup>c</sup> Department of Medicinal Chemistry, Faculty of Pharmacy and Pharmaceutical Sciences Research Center, Tehran University of Medical Sciences, Tehran 14176, Iran

<sup>d</sup> Drug Design & Development Research Center, Tehran University of Medicinal Sciences, Tehran, Iran

Tel. +98(28)33336366; Fax +98(28)33344081; E-mail: rezanejad@pnu.ac.ir

Tel. +98(21)66461178; Fax +98(21)66461178; E-mail: akbarzad@tums.ac.

#### Synthesis of ethyl-1,3,4-triphenyl-1H-pyrazolo[3,4-b]pyridine-6-carboxylate **3a**, General Procedure

At the outset, a mixture of 1,3-diphenyl-1H-pyrazol-5-amine **1a** (1 mmol) and ethyl 2,4-dioxo-4-phenylbutanoates **2a** (1 mmol) in refluxing CH<sub>3</sub>CO<sub>2</sub>H (10 mL) was stirred for 5 h (Scheme S1). The progress of the reaction was monitored by TLC (ethyl acetate/*n*-hexane: 1/2). After completion, the reaction was cooled to room temperature, and the precipitated product was filtered, washed with ethanol (20 mL) and purified by crystallization to afford the pure product **3a** as a pure powder.

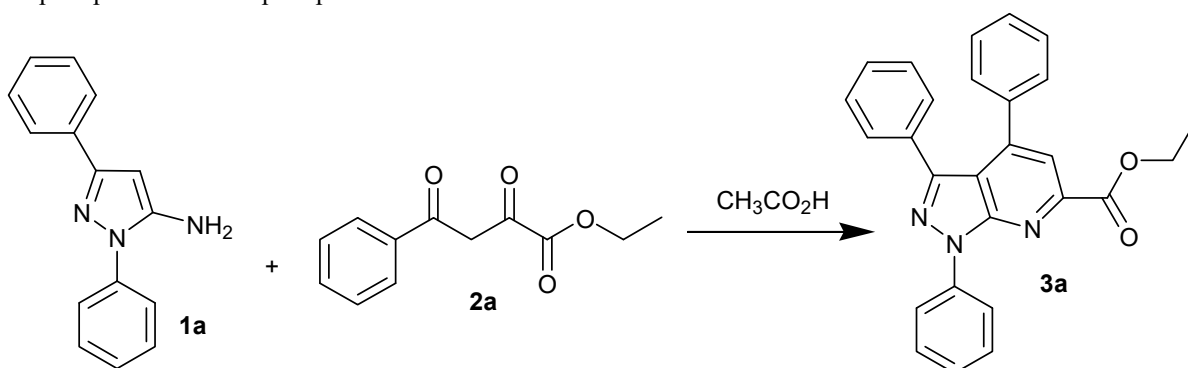

Scheme S1 Synthesis of novel pyrazolo[3,4-b]pyridine **3a**

**<sup>1</sup>H NMR: Ethyl-1,3,4-triphenyl-1H-pyrazolo[3,4-b]pyridine-6-carboxylate (3a)**

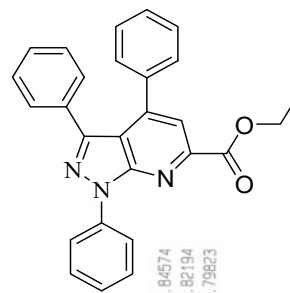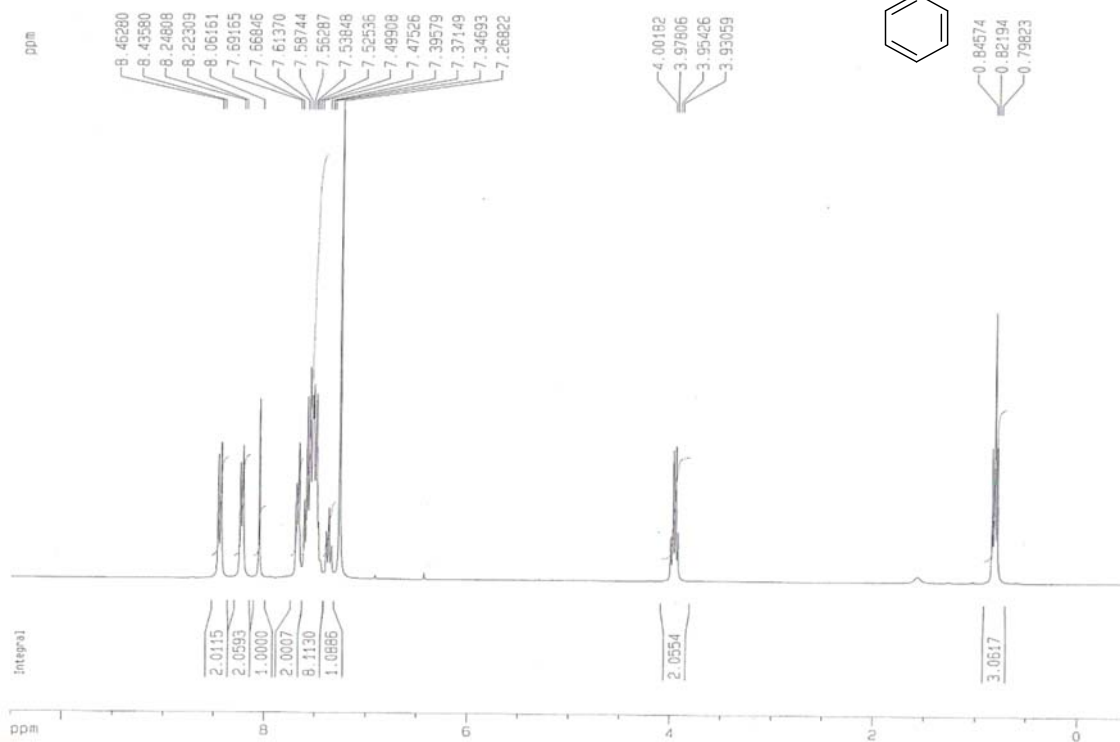

**<sup>13</sup>C NMR (3a)**

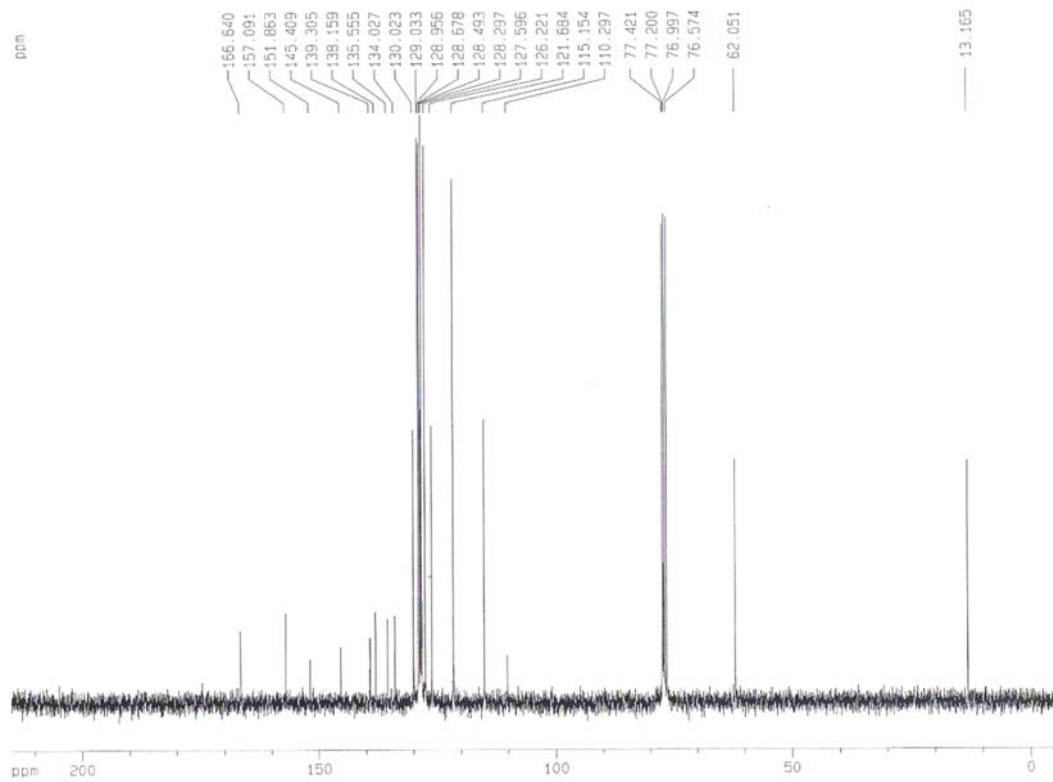

<sup>1</sup>H NMR Ethyl-4-(4-fluorophenyl)-1,3-diphenyl-1H-pyrazolo[3,4-b]pyridine-6-carboxylate (3b)

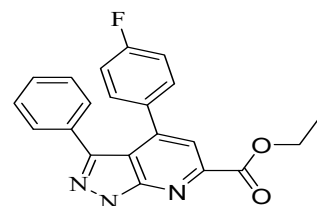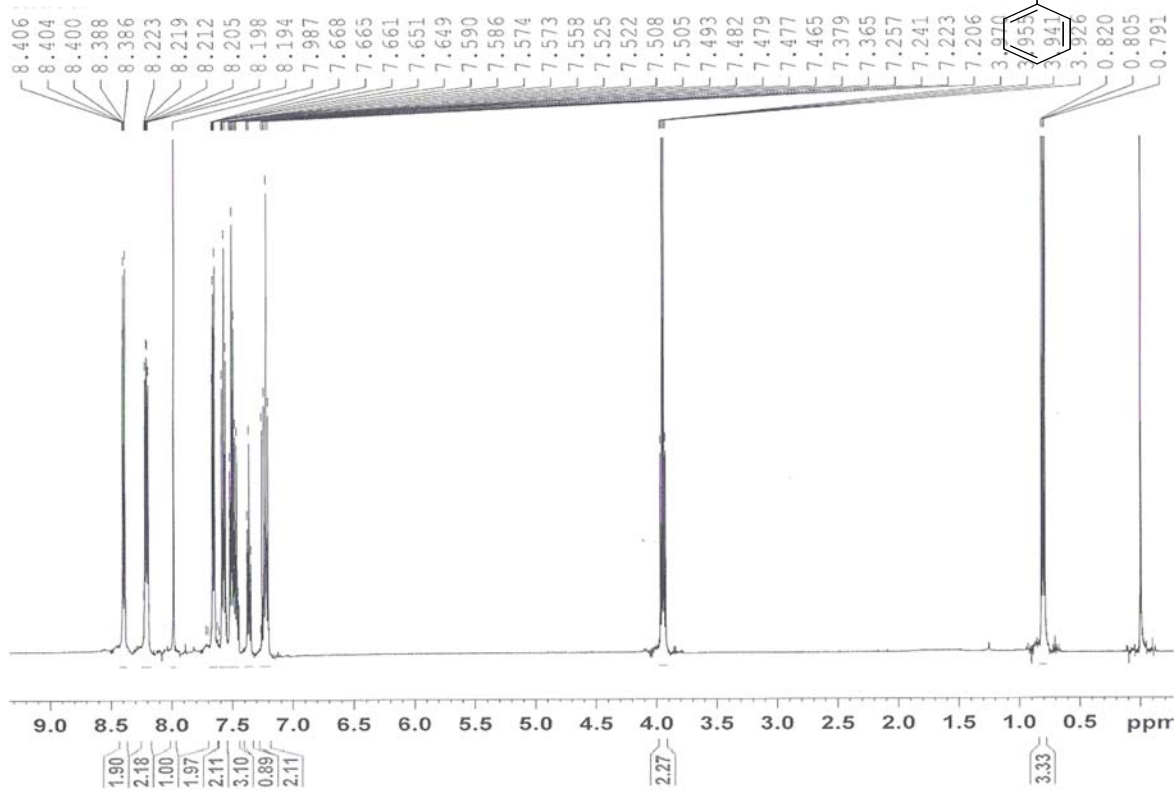

**<sup>13</sup>C NMR (3b)**

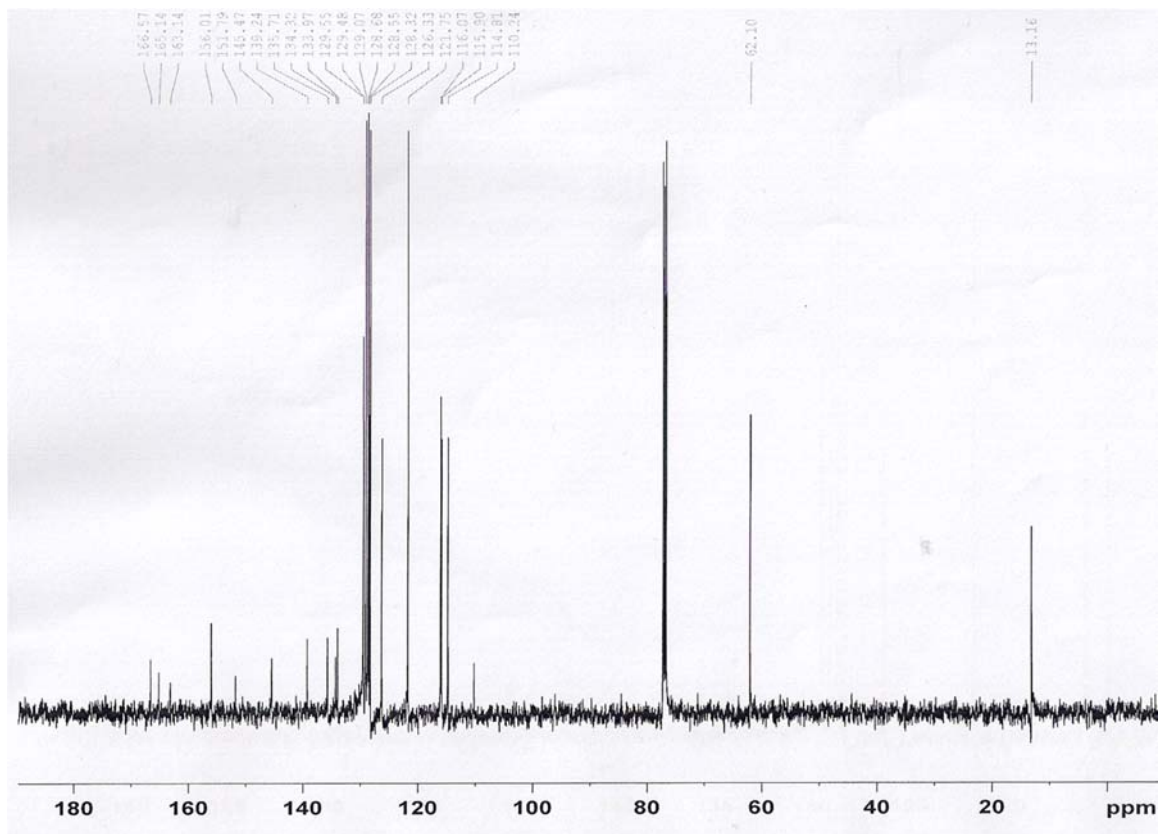

**<sup>1</sup>H NMR Ethyl-4-(4-bromophenyl)-1,3-diphenyl-1H-pyrazolo[3,4-b]pyridine-6-carboxylate (3c):**

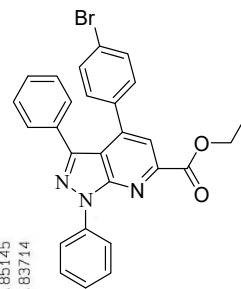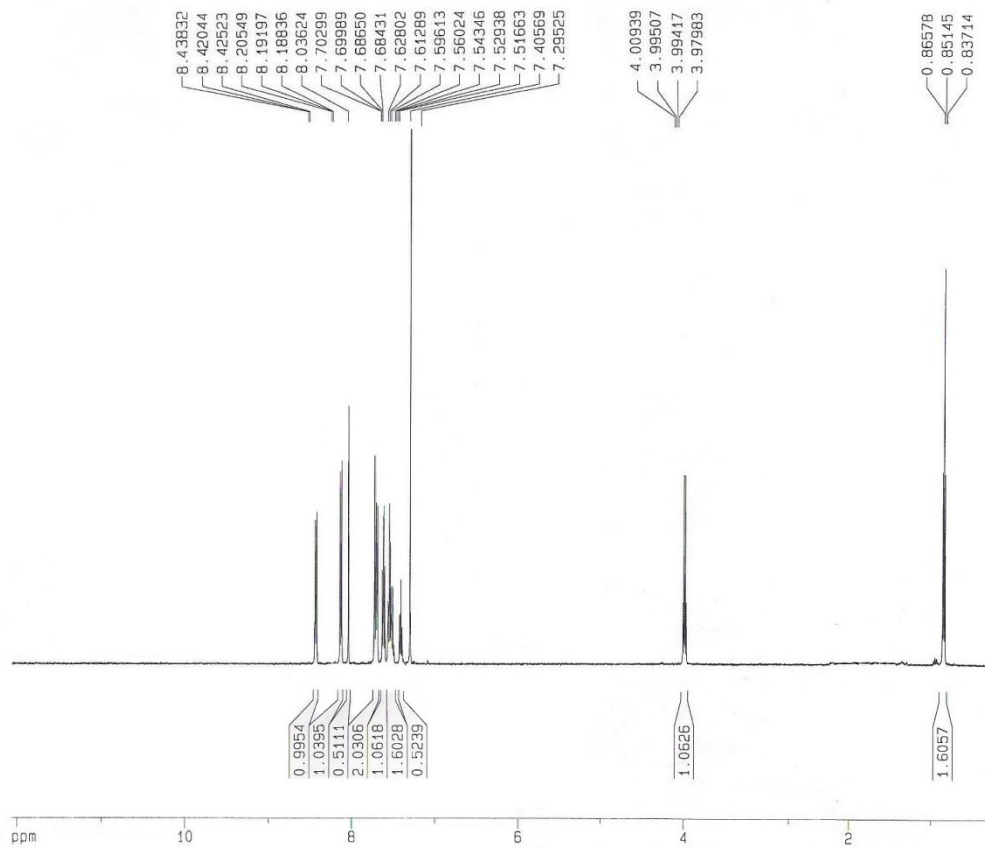

**<sup>13</sup>C NMR (3c)**

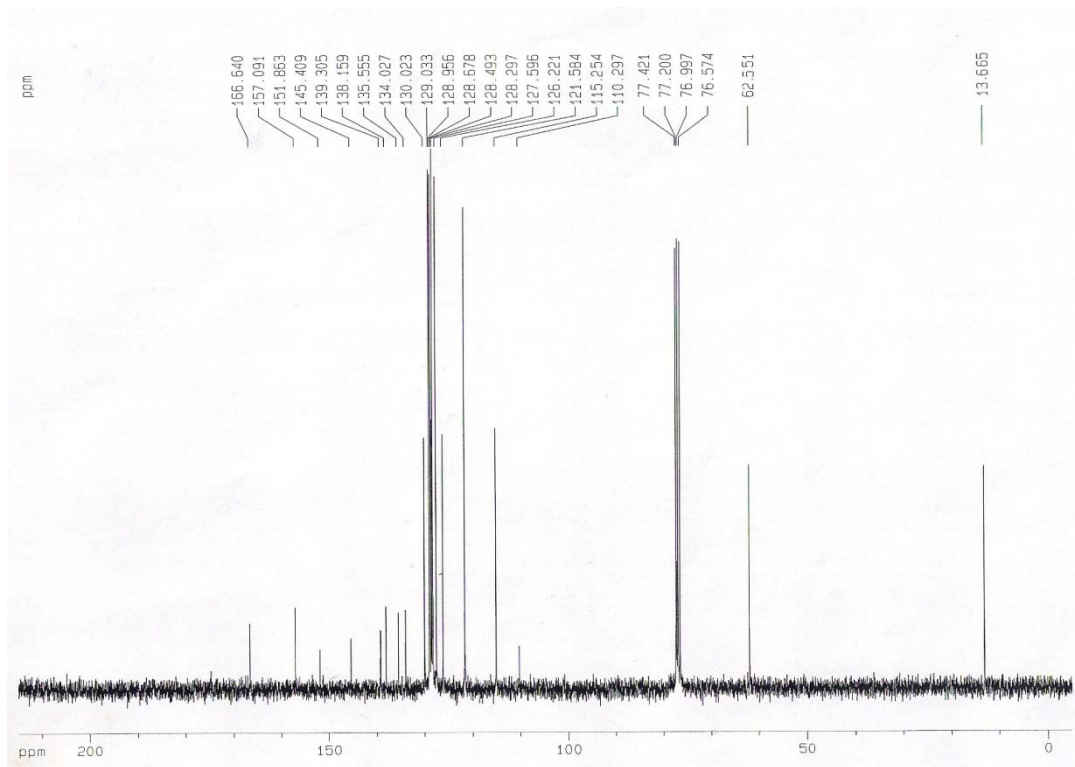

**<sup>1</sup>H NMR: Ethyl-4-(4-chlorophenyl)-1,3-diphenyl-1H-pyrazolo[3,4-b]pyridine-6-carboxylate (3d)**

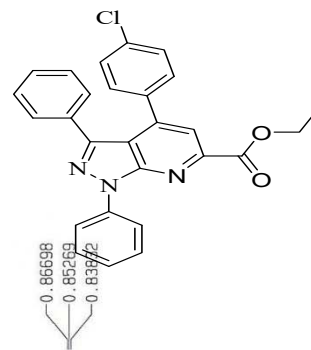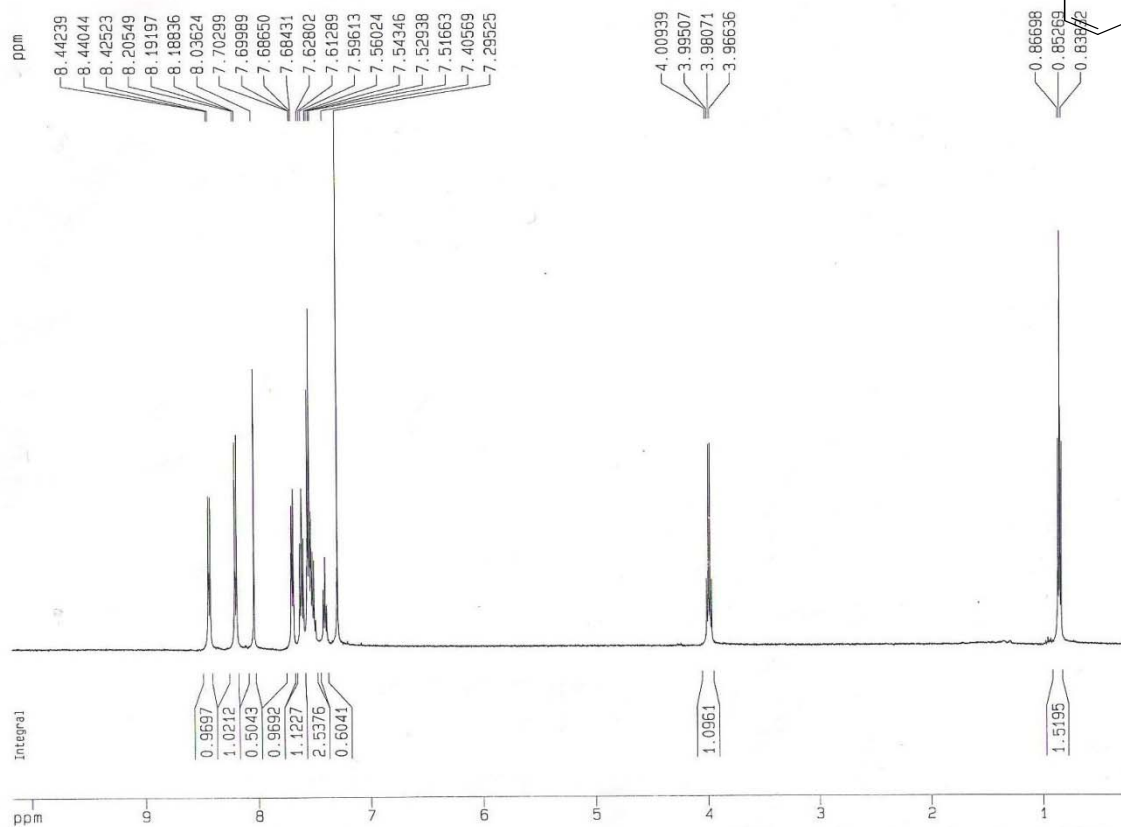



<sup>13</sup>C NMR (3d)

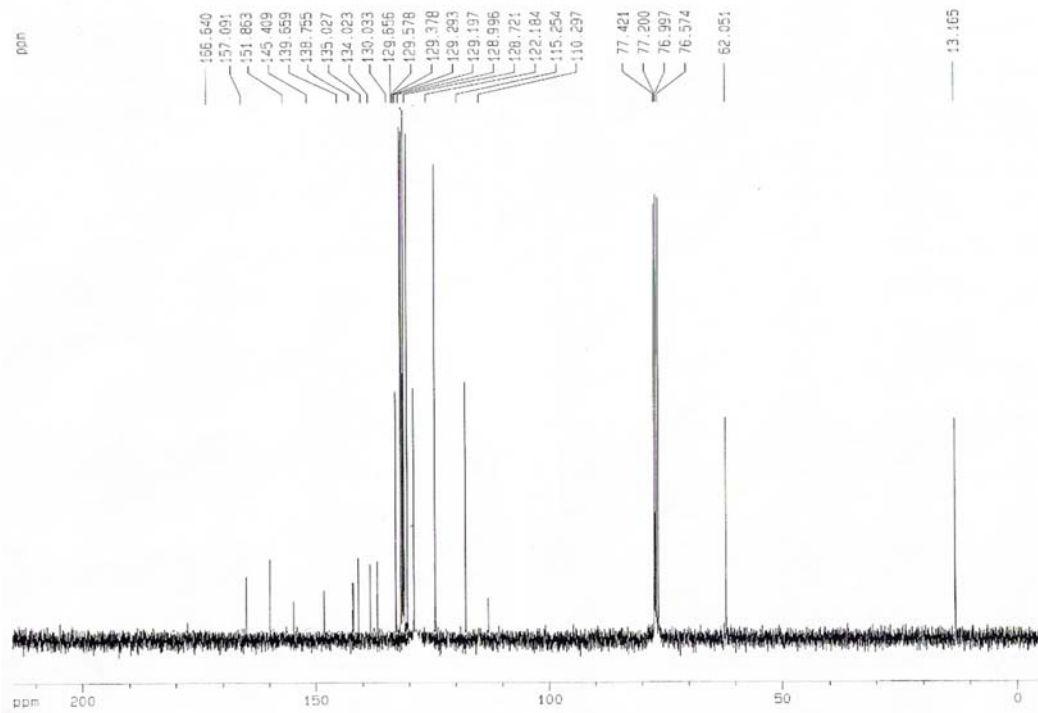

<sup>1</sup>H NMR: Ethyl-4-(2-chlorophenyl)-1,3-diphenyl-1H-pyrazolo[3,4-b]pyridine-6-carboxylate (3e)

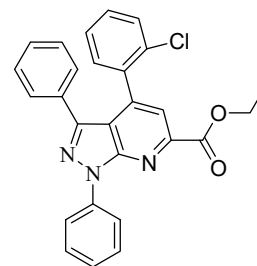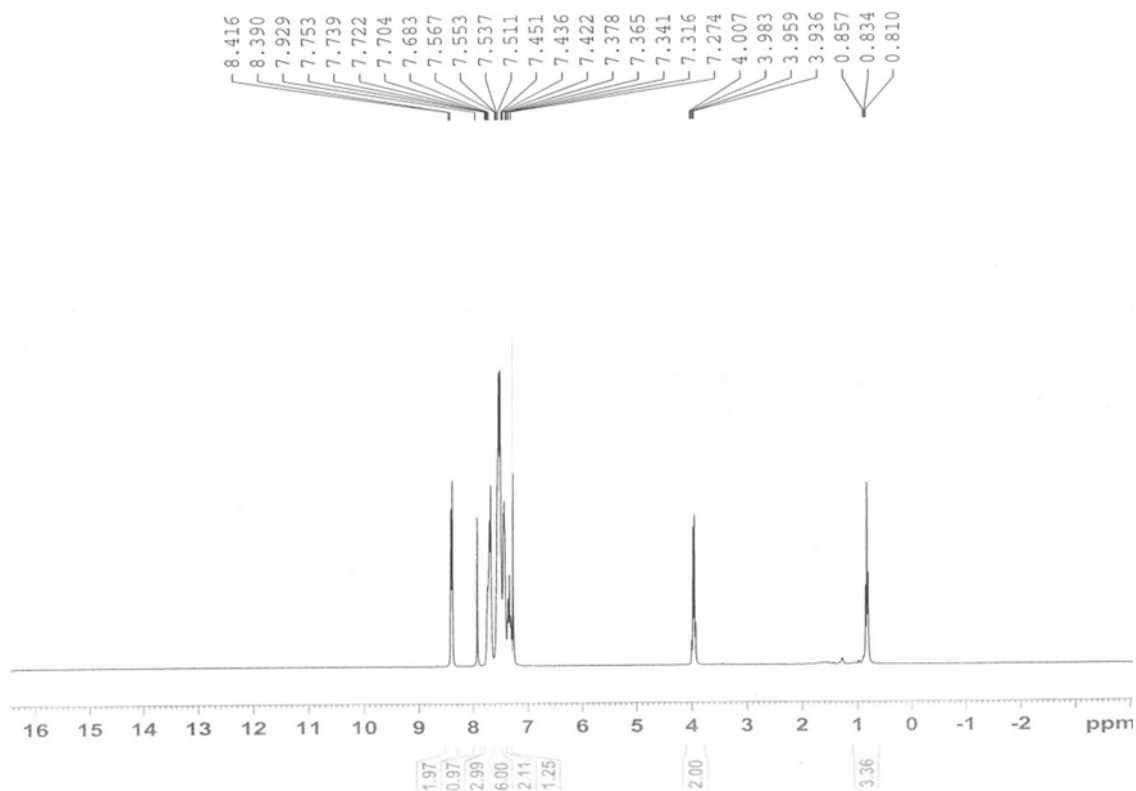

**<sup>13</sup>C NMR (3e)**

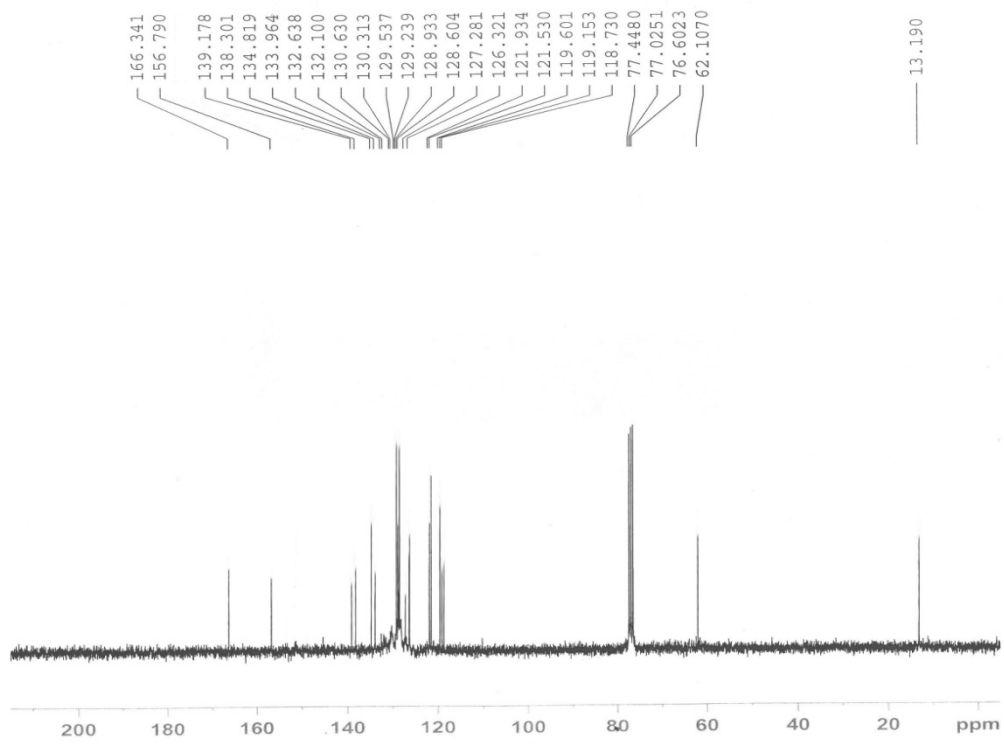

**<sup>1</sup>H NMR: Ethyl-4-(2,4-dichlorophenyl)-1,3-diphenyl-1H-pyrazolo[3,4-b]pyridine-6-carboxylate (3f)**

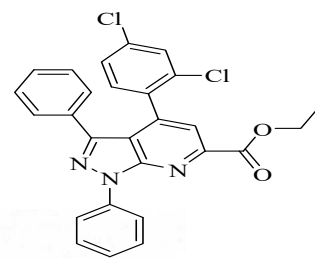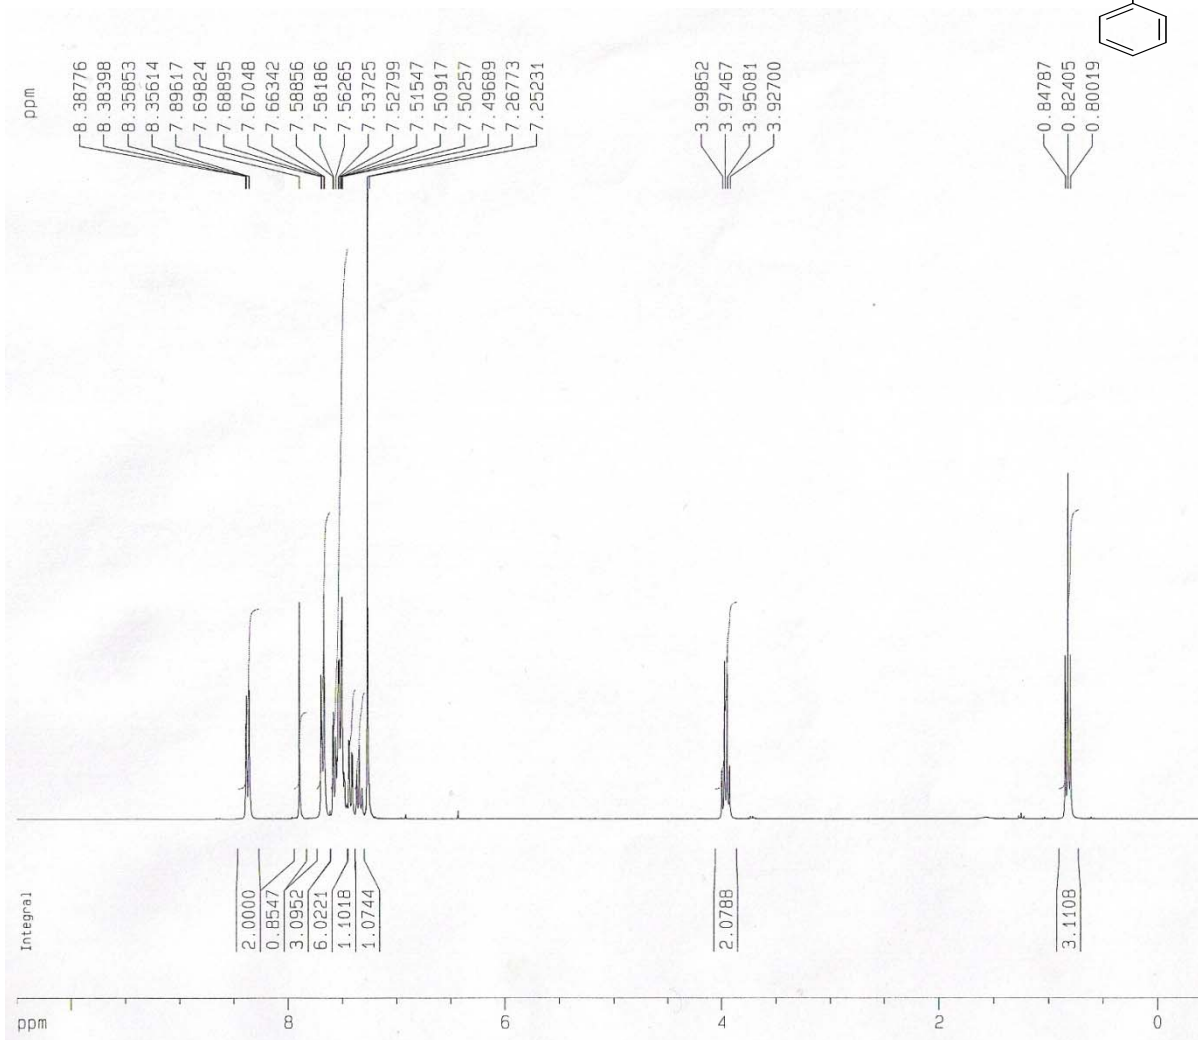

**<sup>13</sup>C NMR (3f)**

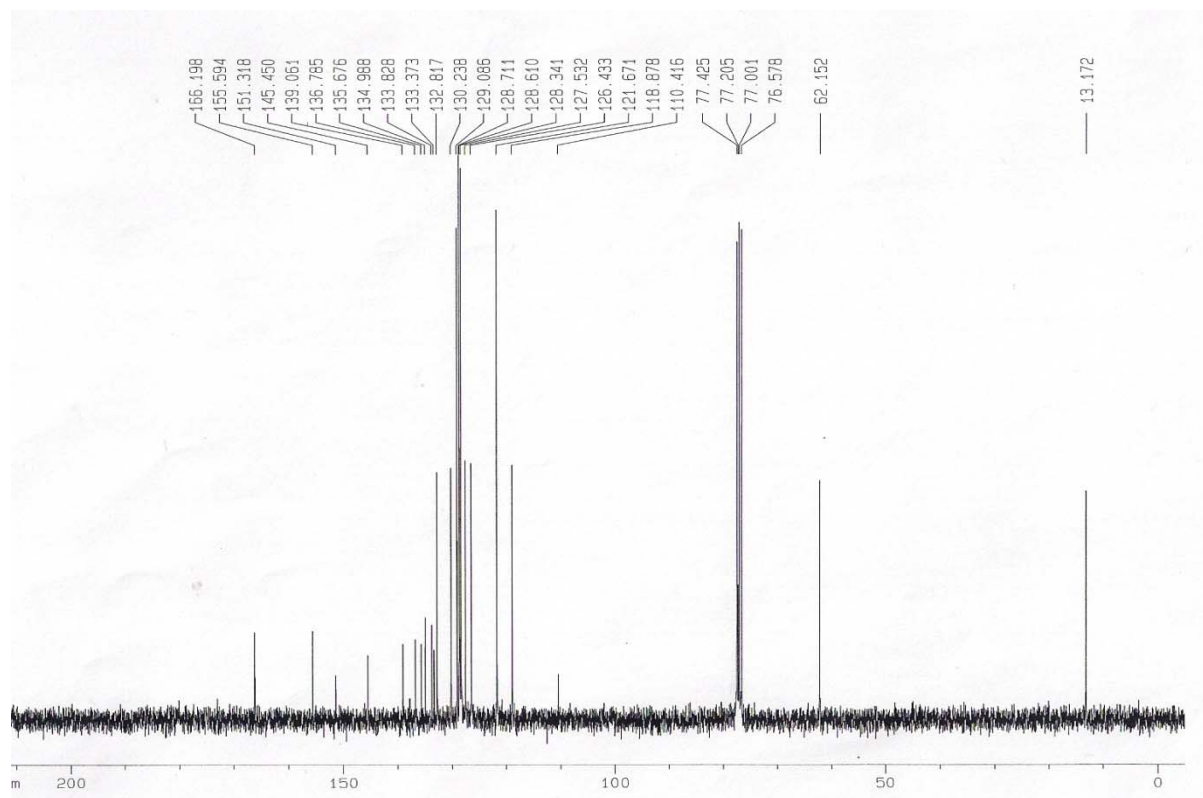

**<sup>1</sup>H NMR: Ethyl-1,3-diphenyl-4-p-tolyl-1H-pyrazolo[3,4-b]pyridine-6-carboxylate (3g):**

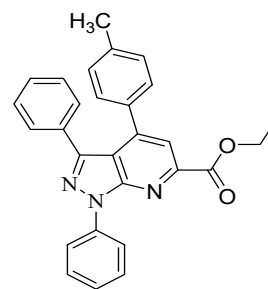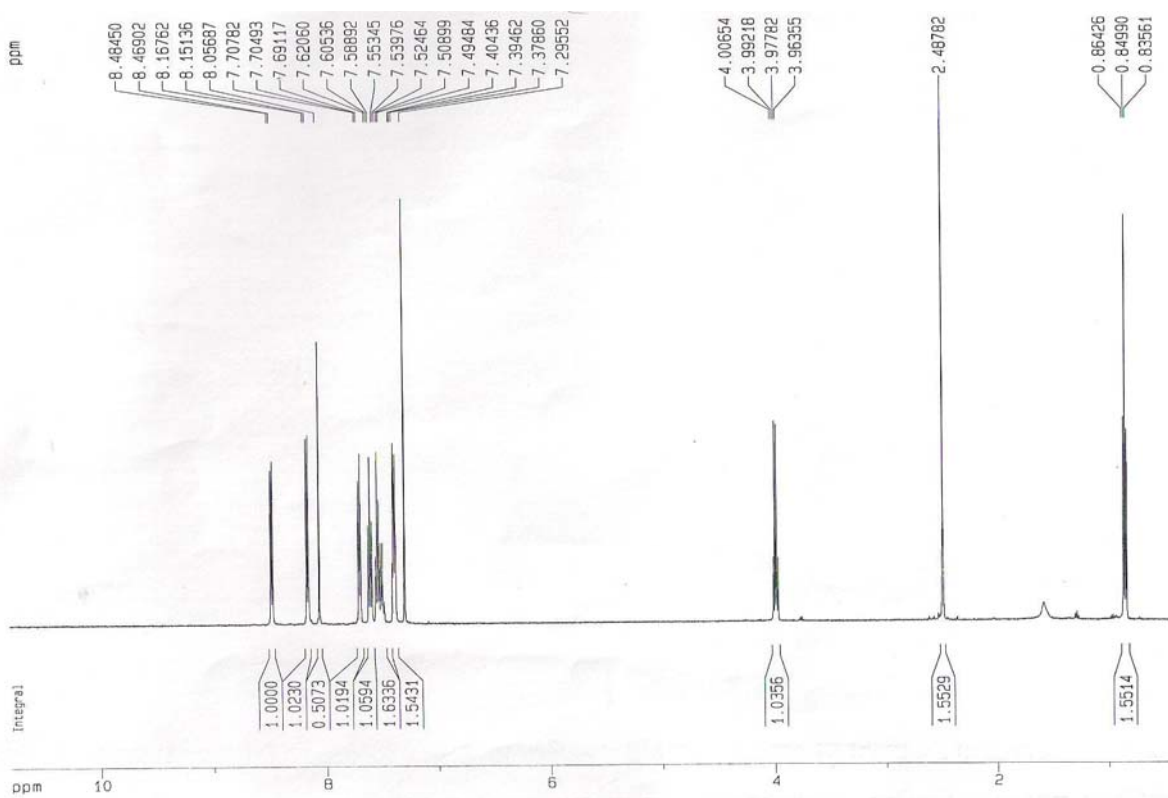

<sup>13</sup>CNMR (3g)

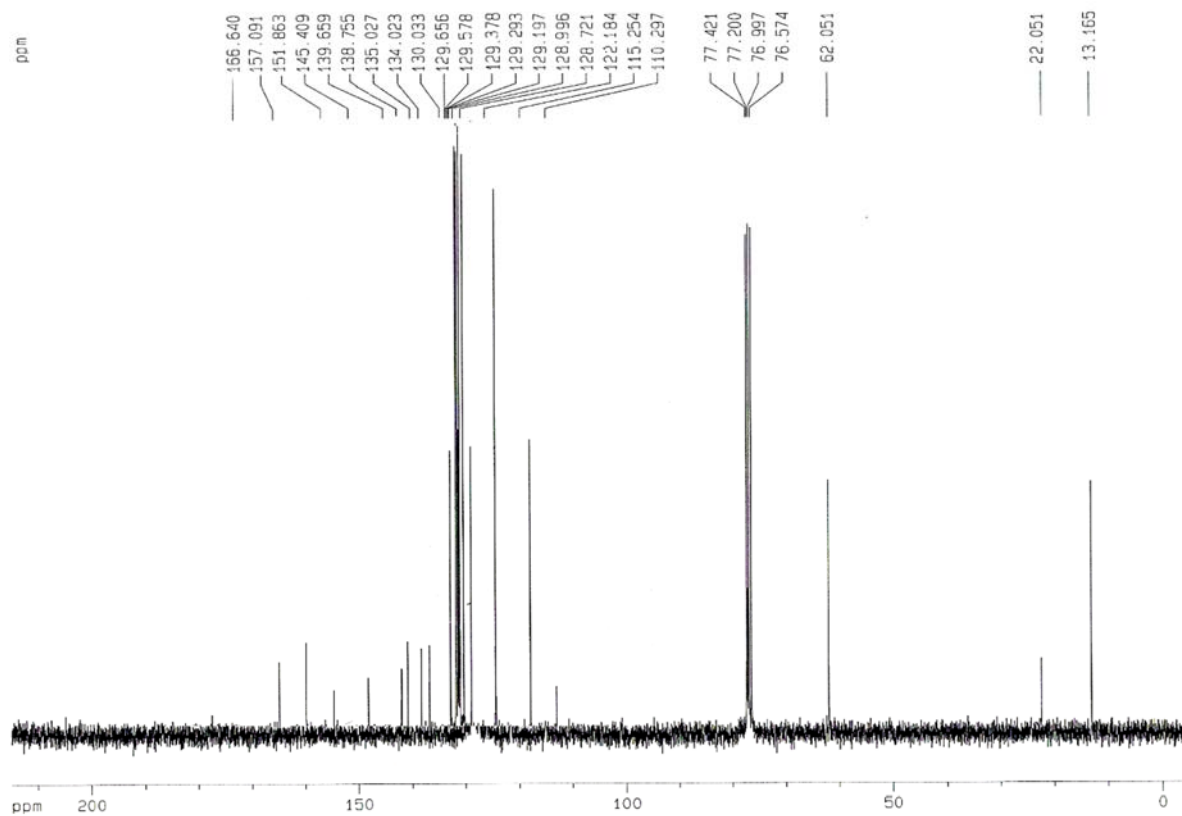

**<sup>1</sup>H NMR: Ethyl-1,3-diphenyl-4-m-tolyl-1H-pyrazolo[3,4-b]pyridine-6-carboxylate (3h)**

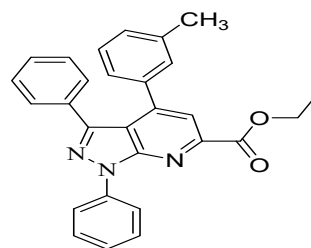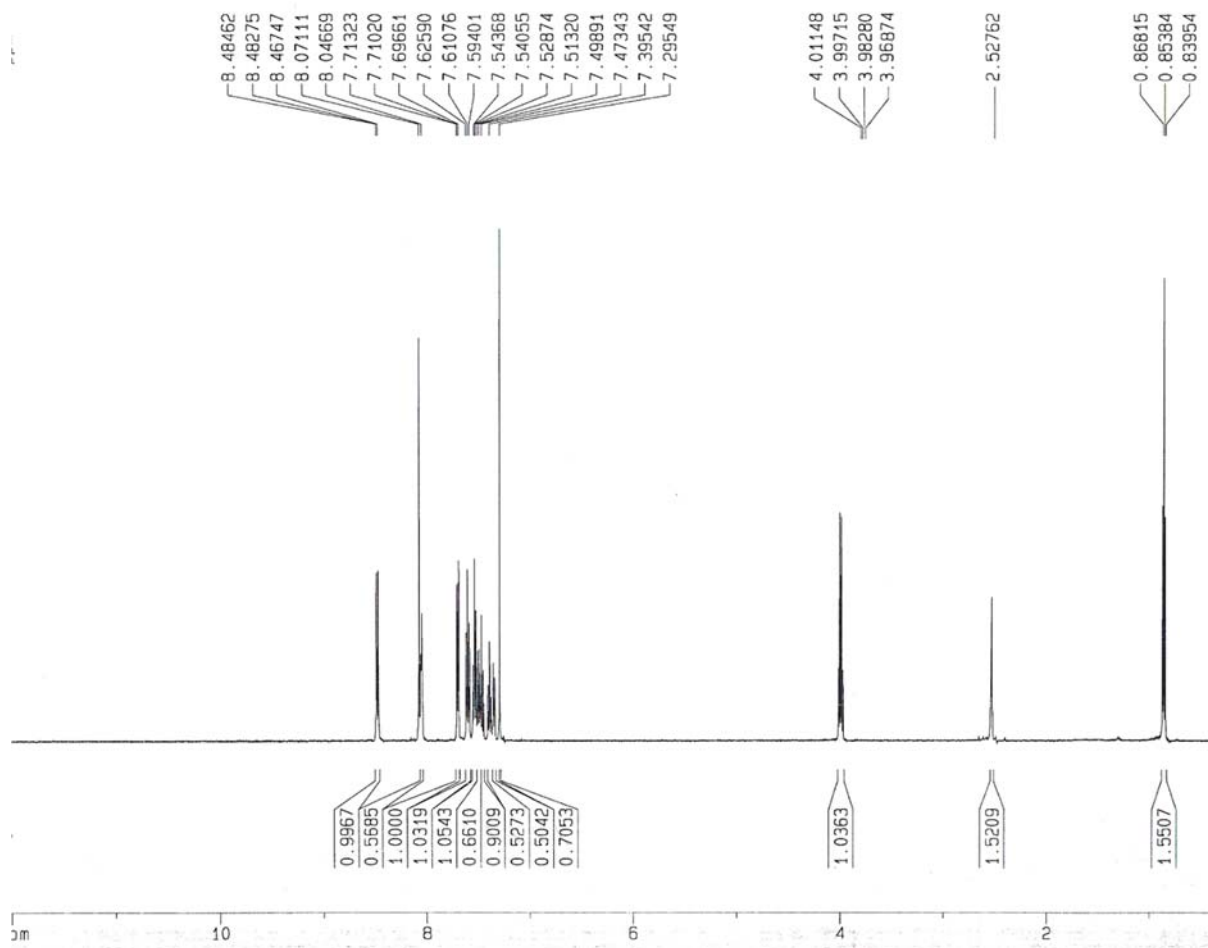



**<sup>13</sup>C NMR (3h)**

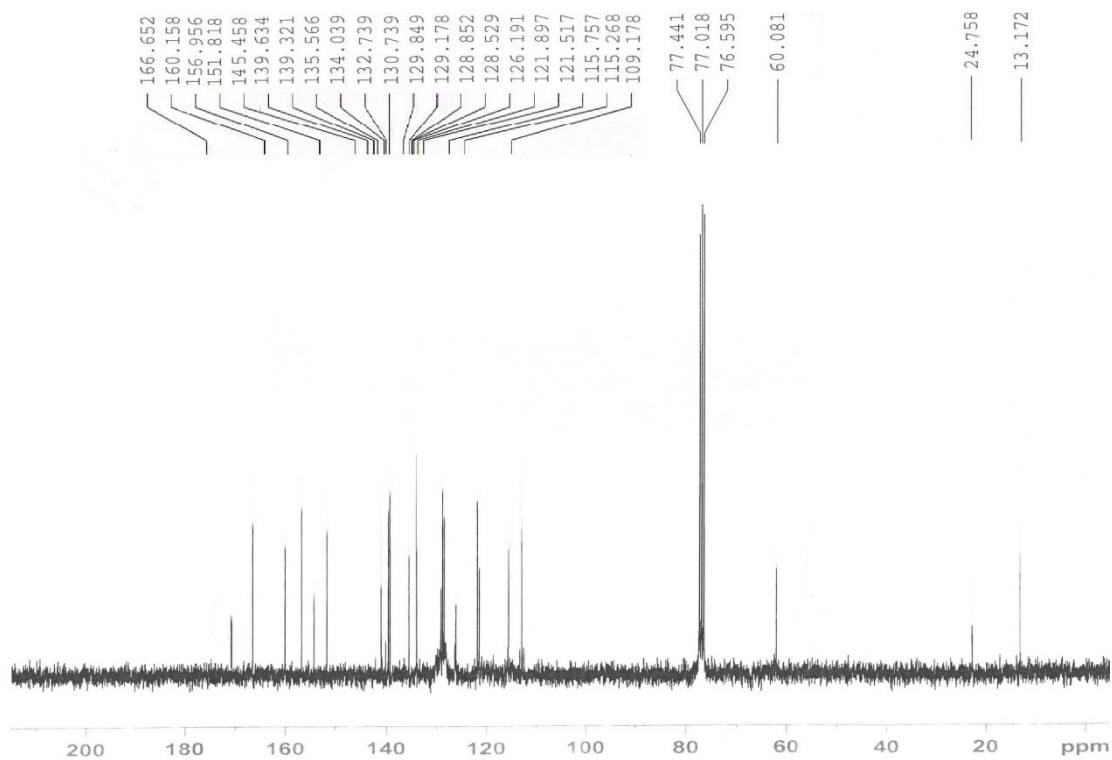

<sup>1</sup>H NMR: Ethyl-4-(4-methoxyphenyl)-1,3-diphenyl-1H-pyrazolo[3,4-b]pyridine-6-carboxylate (3i)

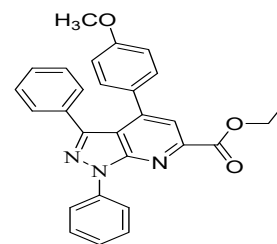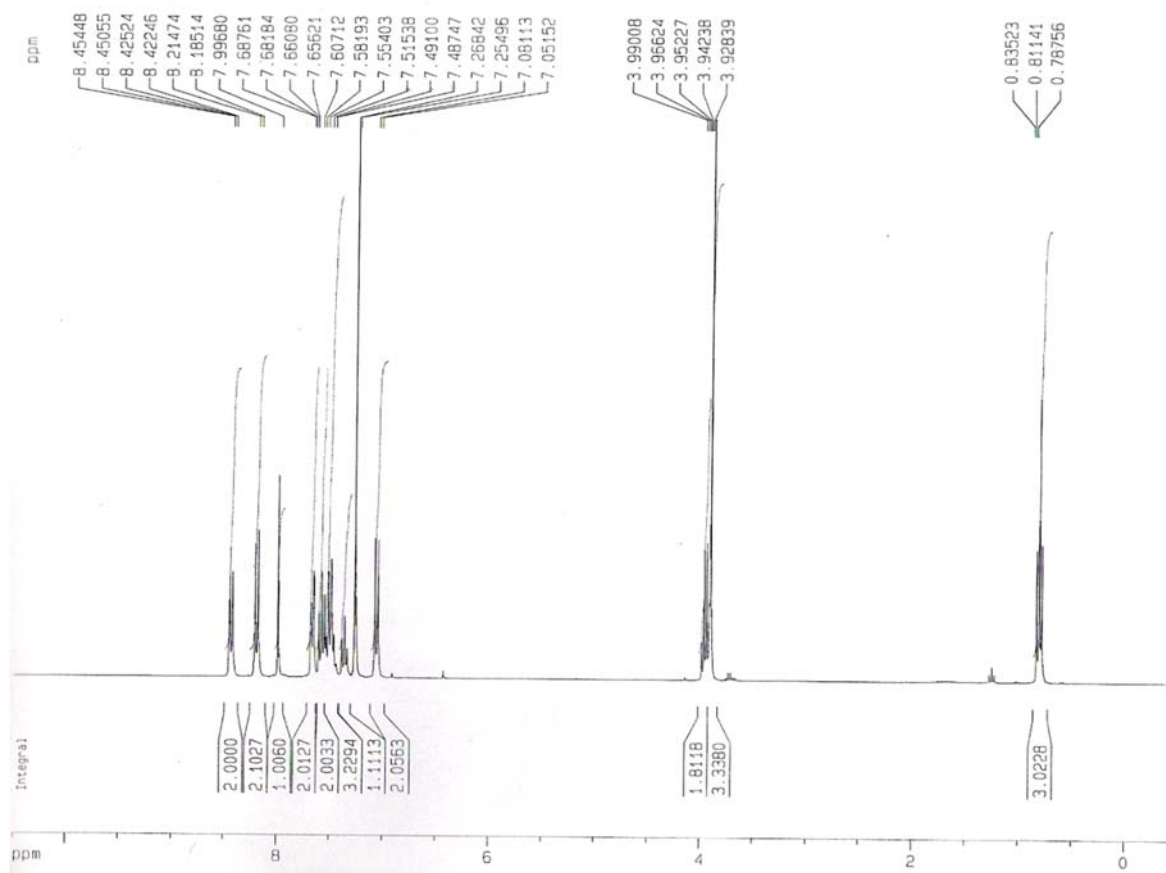

<sup>13</sup>C NMR (3i)

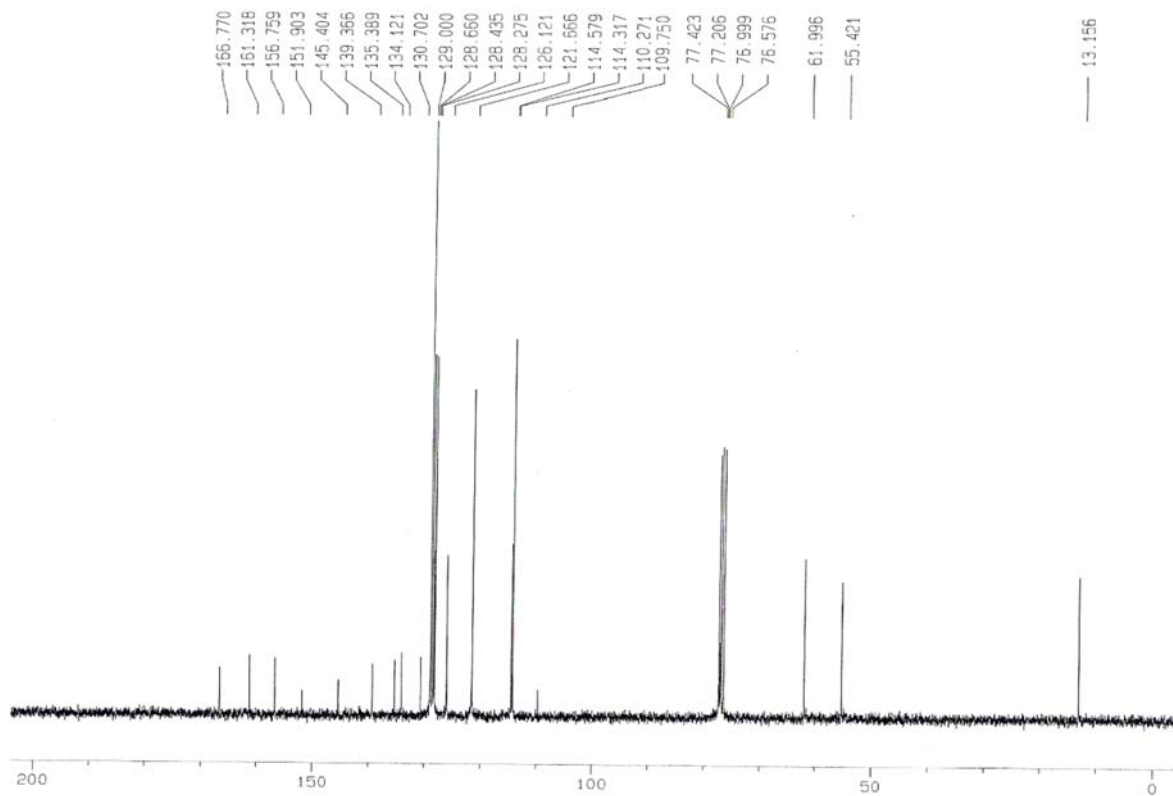

<sup>1</sup>H NMR: Ethyl-4-(3,4-dimethoxyphenyl)-1,3-diphenyl-1H-pyrazolo[3,4-b]pyridine-6-carboxylate (3j)

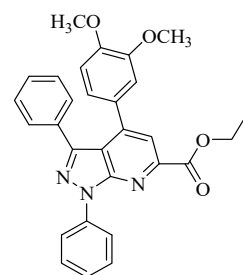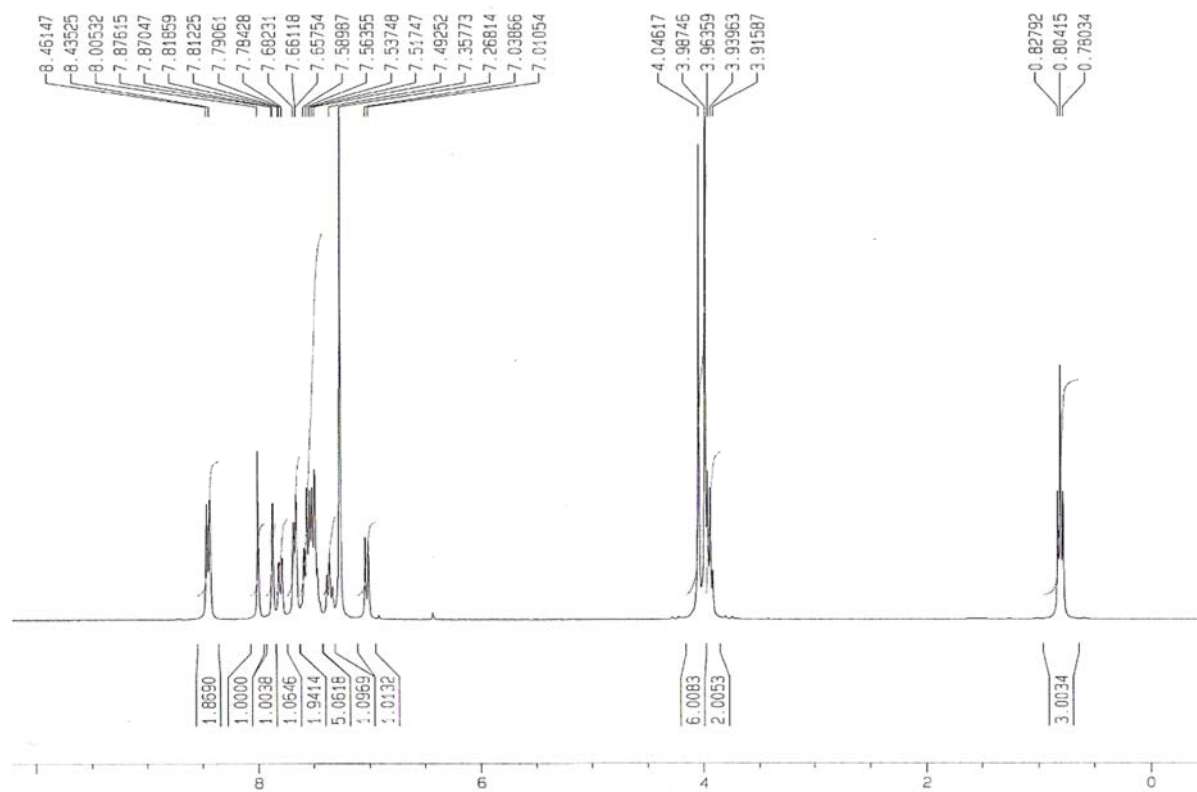

<sup>13</sup>C NMR: (3j)

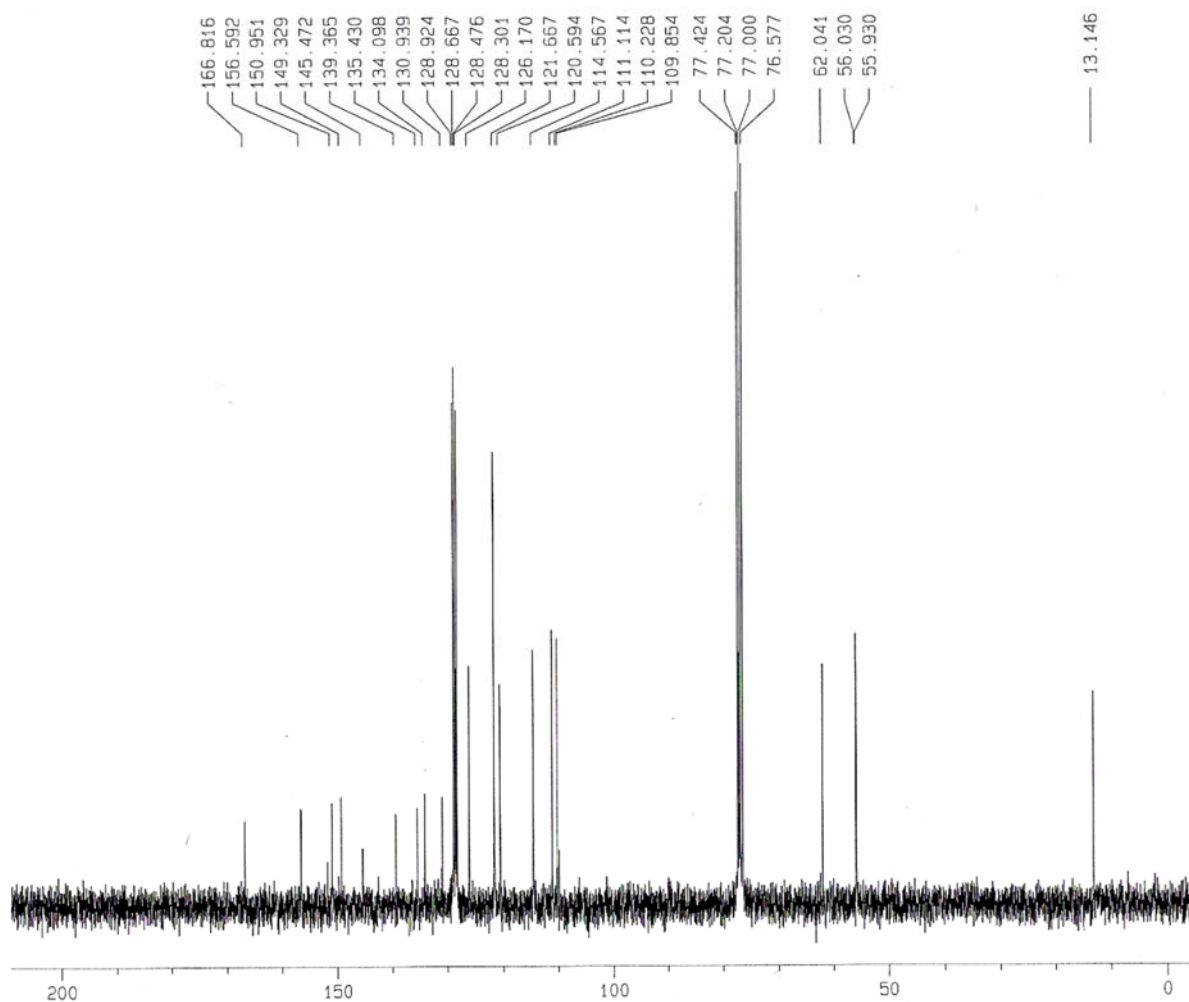

<sup>1</sup>H NMR: Ethyl-4-(3-methoxyphenyl)-1,3-diphenyl-1H-pyrazolo[3,4-b]pyridine-6-carboxylate (3k)

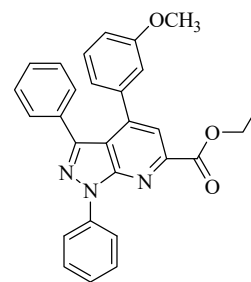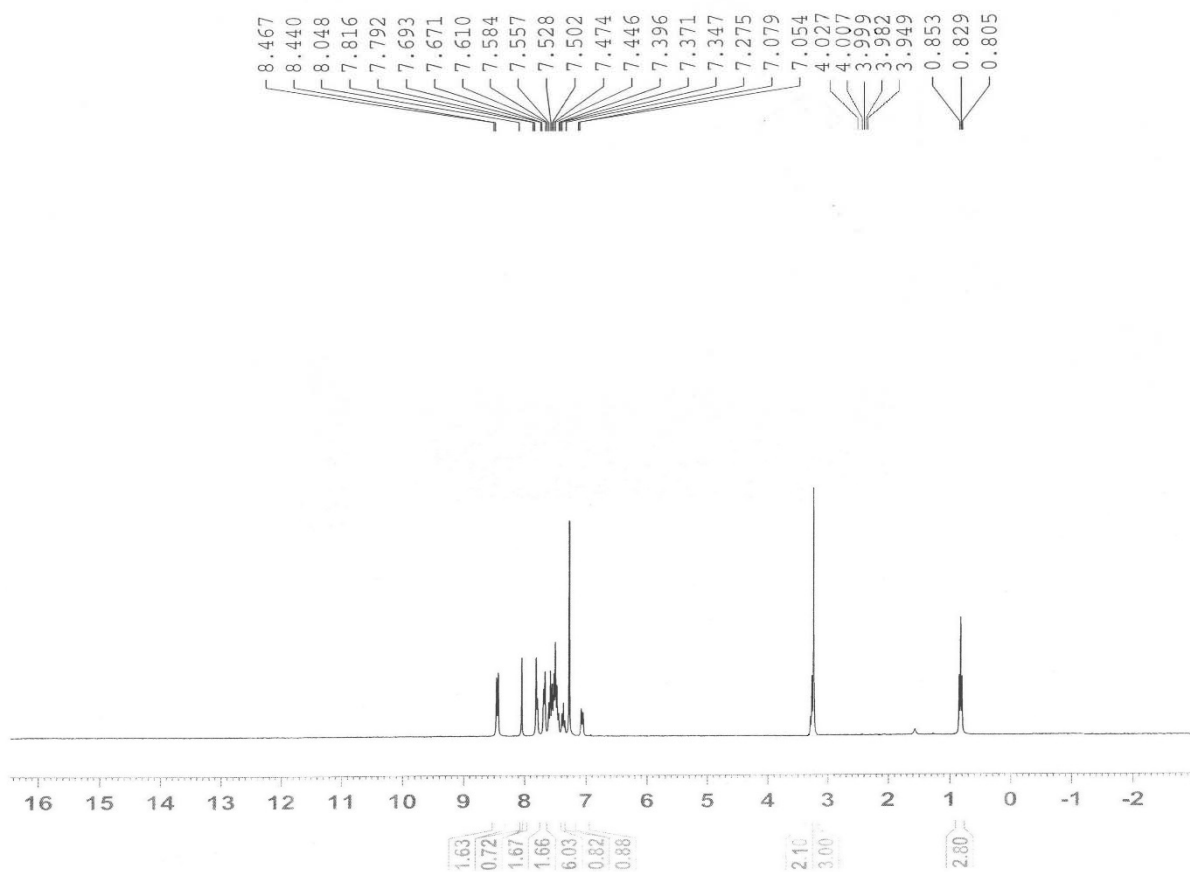

<sup>13</sup>C NMR: (3K)

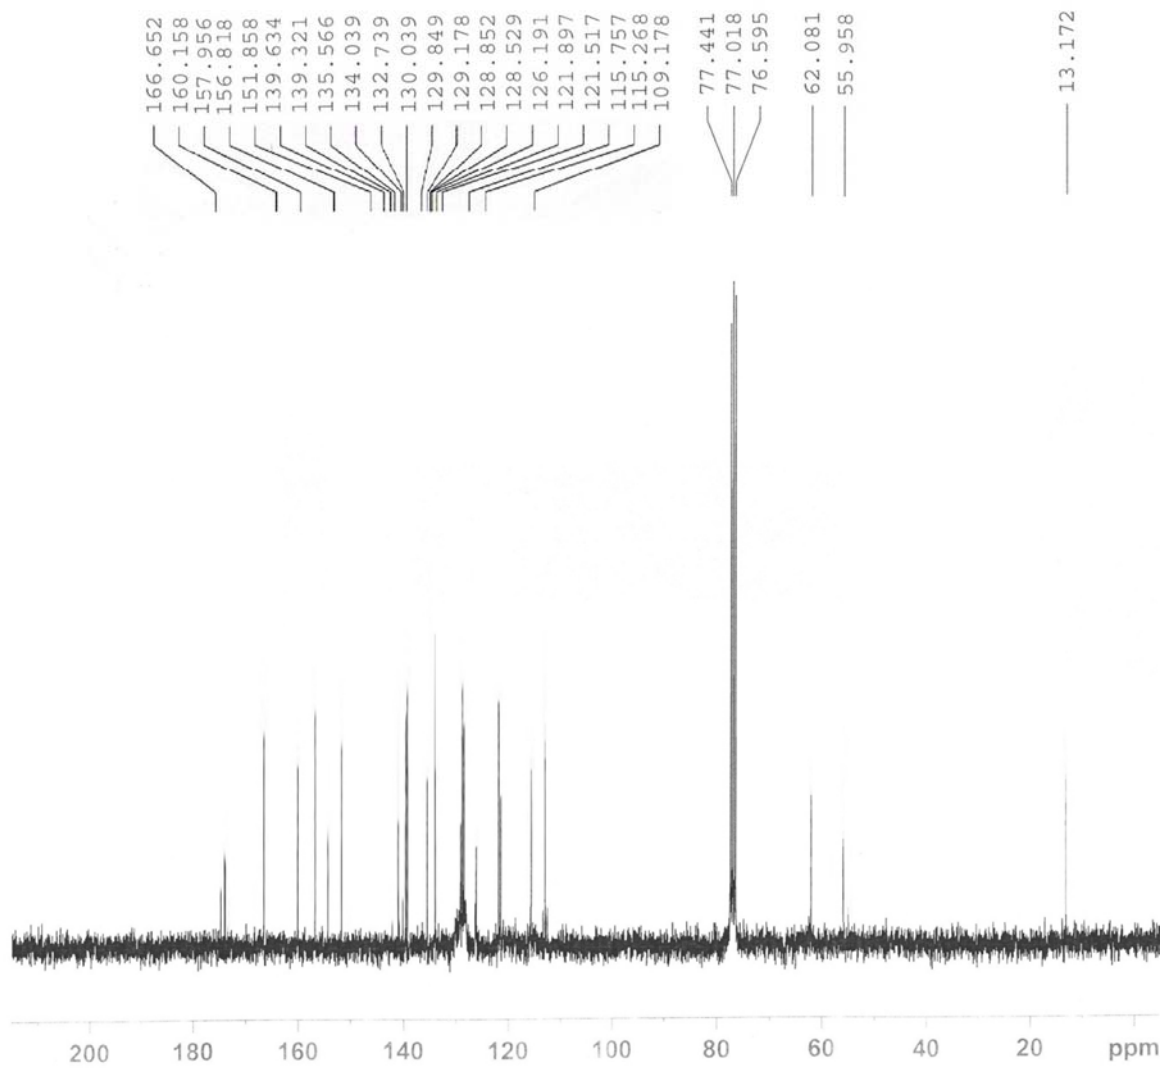

**<sup>1</sup>H NMR: Ethyl 3-methyl-1-phenyl-4-m-tolyl-1H-pyrazolo[3,4-b]pyridine-6-carboxylate (3m)**

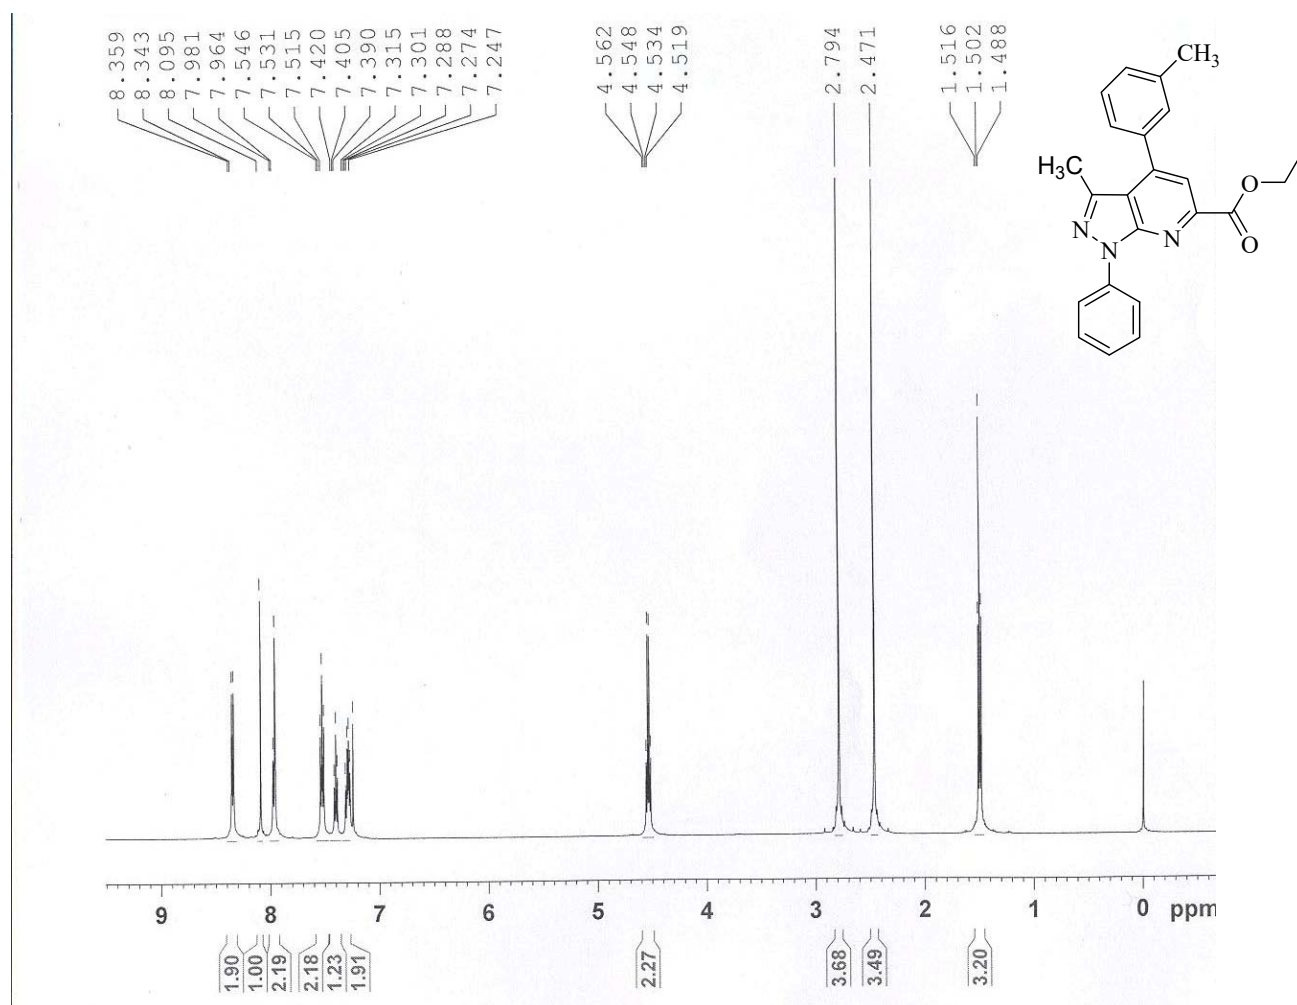



<sup>13</sup>C NMR (3m)

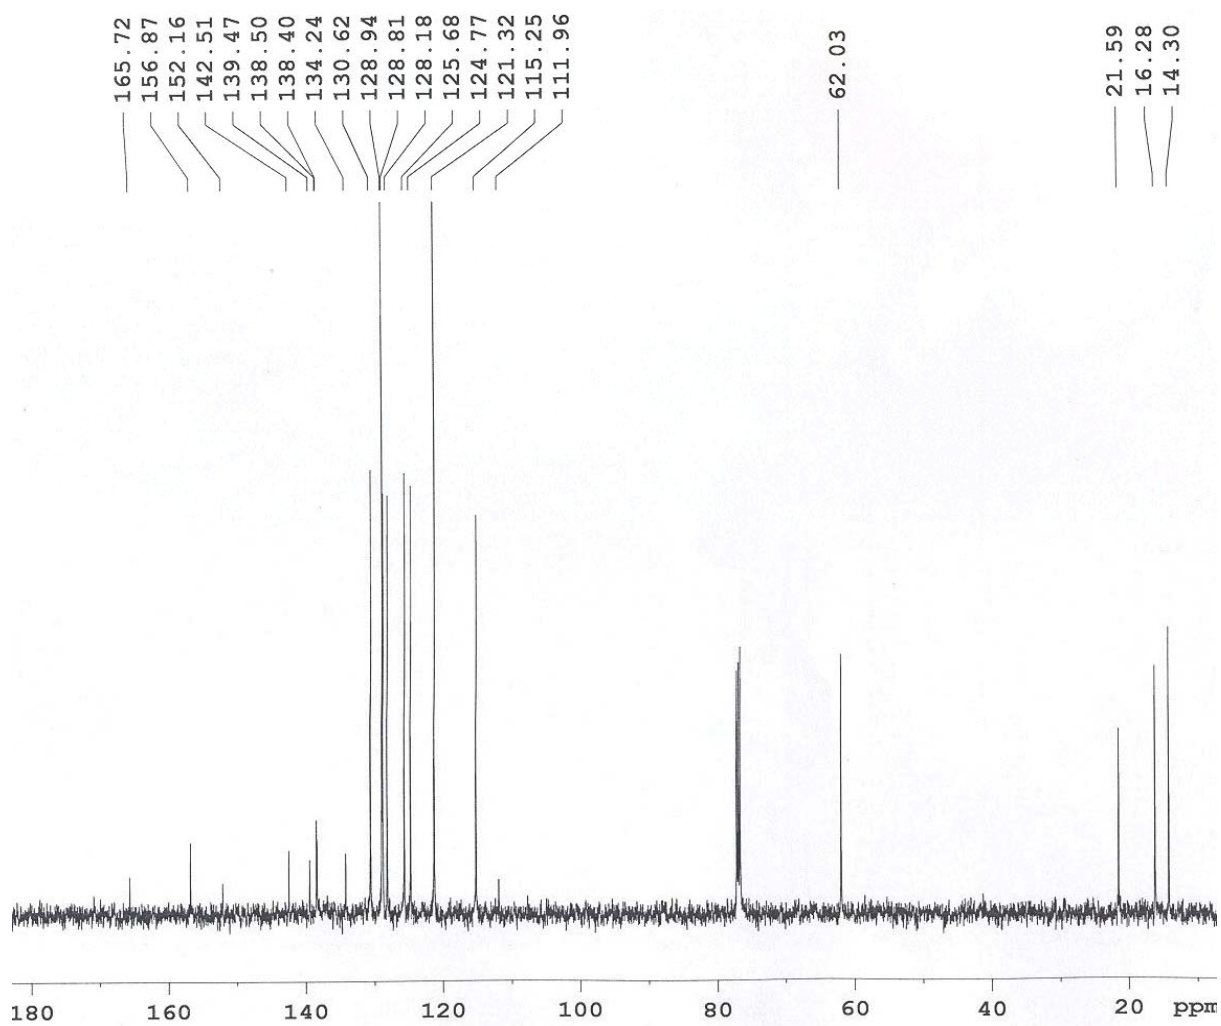

**<sup>1</sup>HNMR: Ethyl 4-(4-fluorophenyl)-3-methyl-1-phenyl-1H-pyrazolo[3,4-b]pyridine-6-carboxylate (3n)**

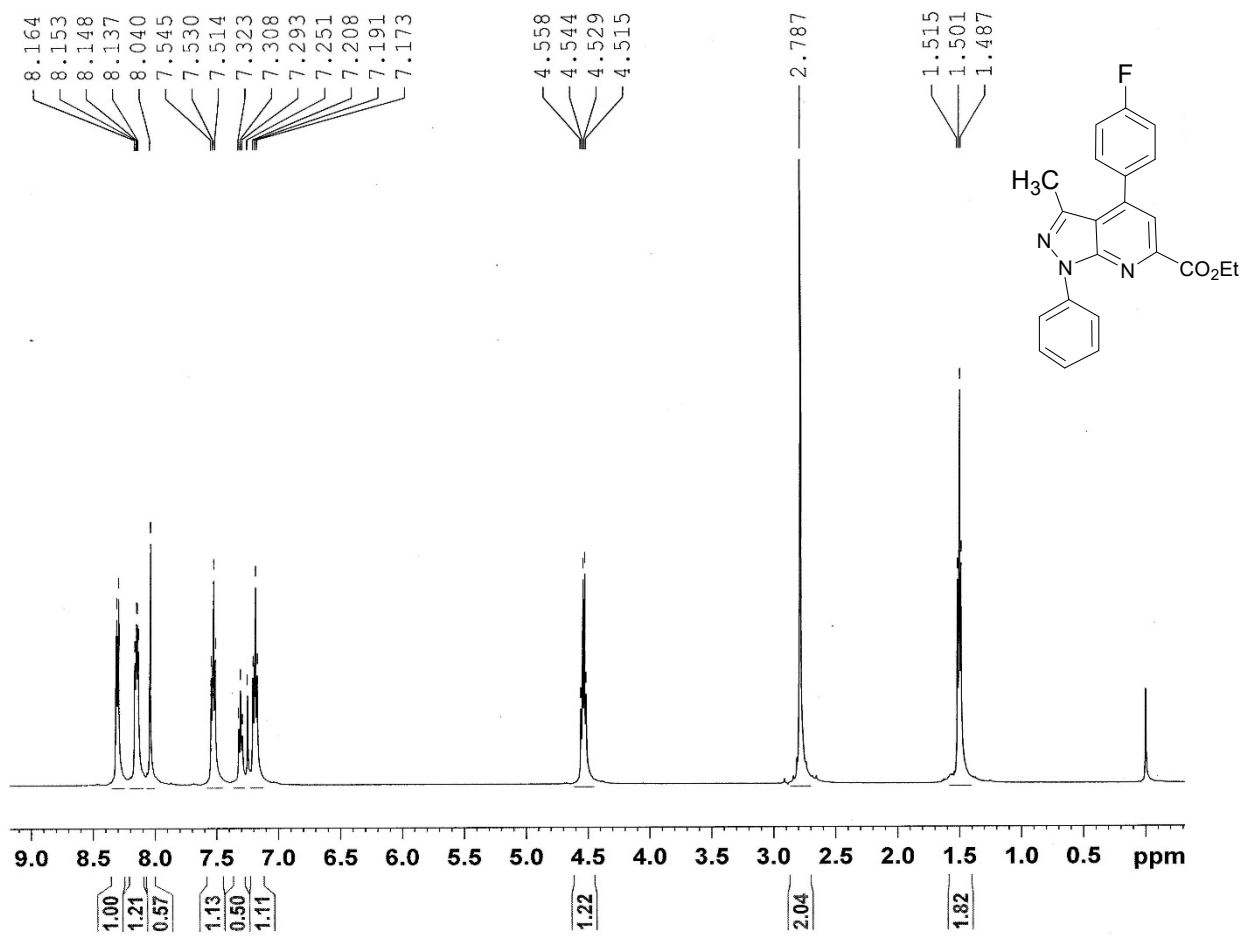

<sup>13</sup>CNMR (3n)

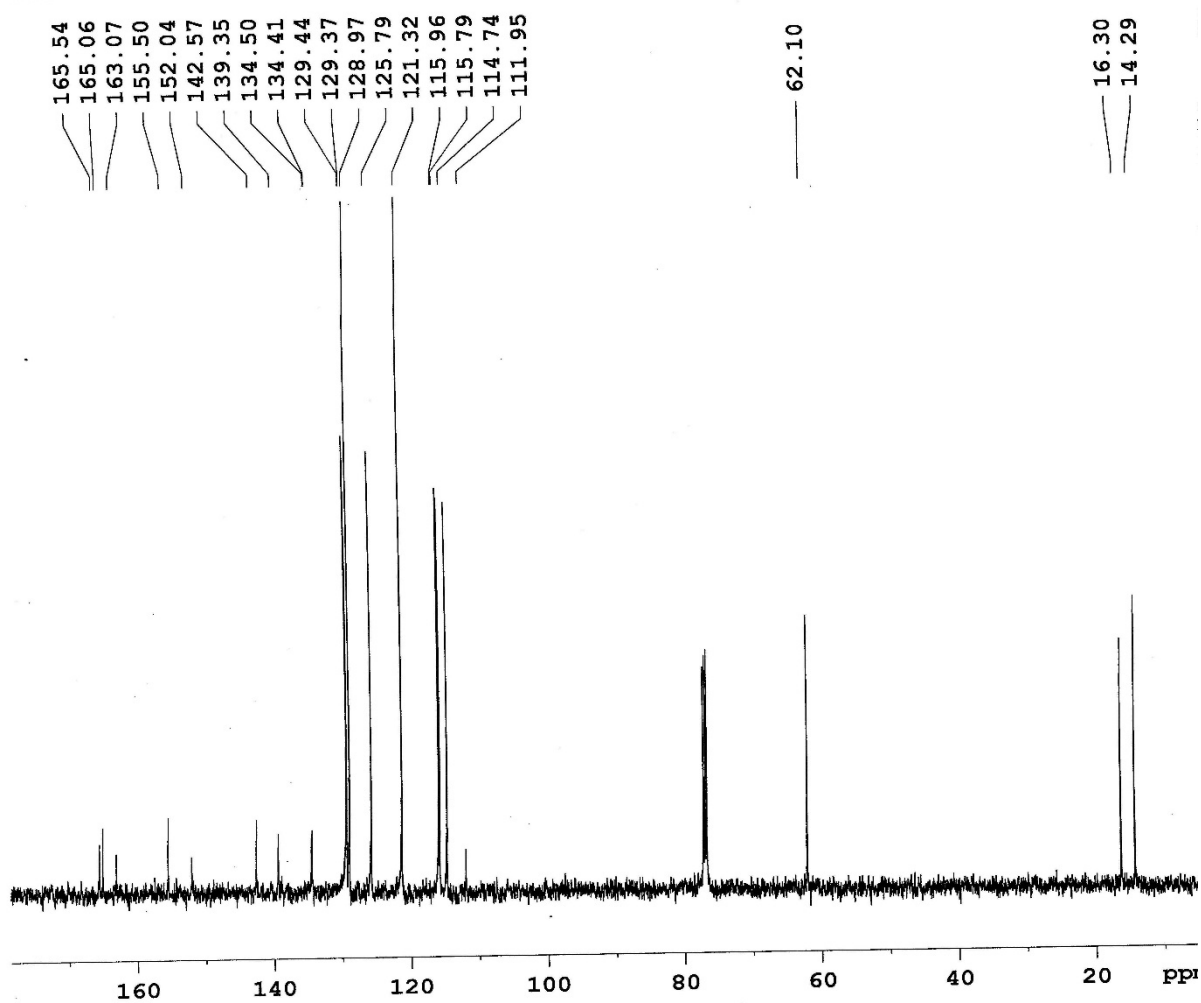

**<sup>1</sup>H NMR: Ethyl 3-methyl-1,4-diphenyl-1H-pyrazolo[3,4-b]pyridine-6-carboxylate (3p)**

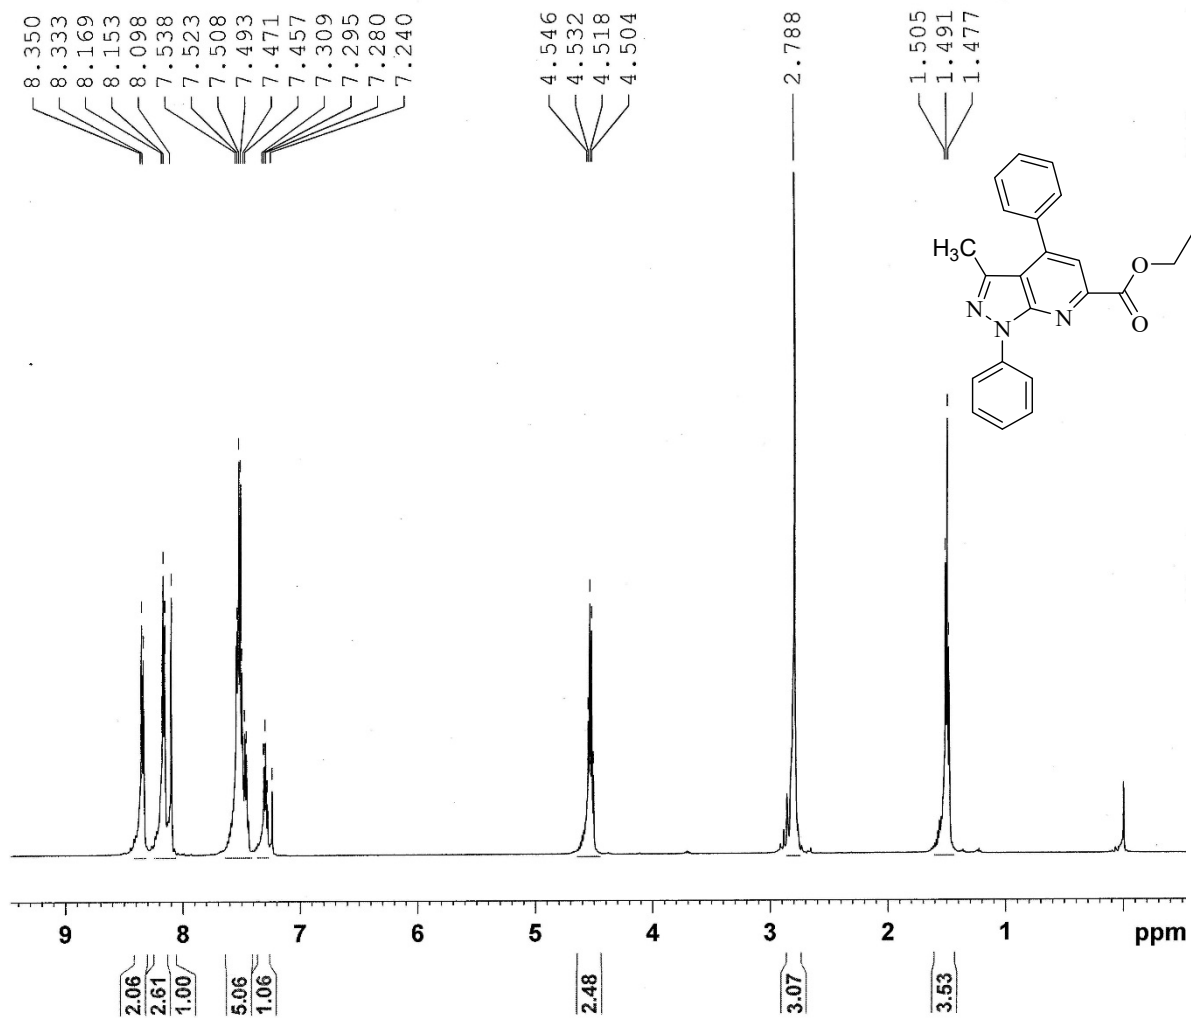

<sup>13</sup>CNMR (3p)

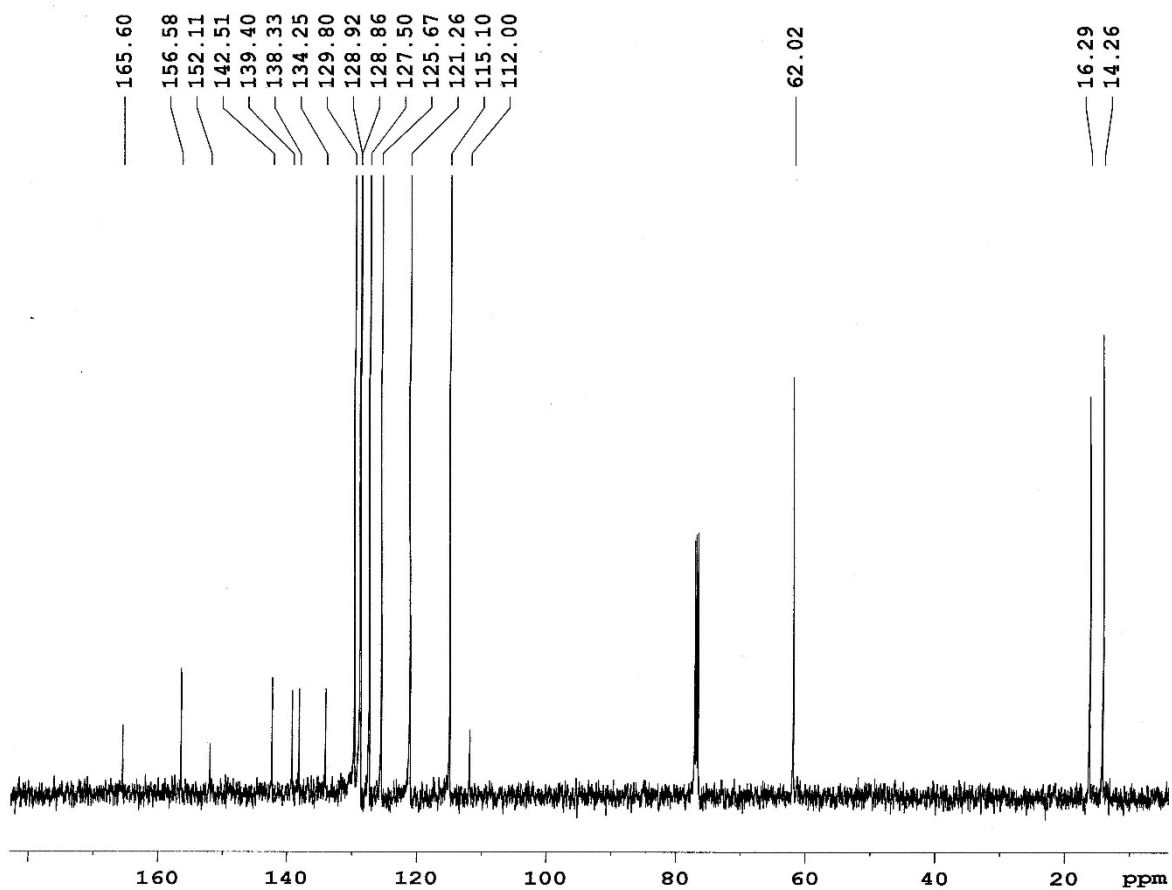

Supplement: c5ra16769h1.pdf [file c5ra16769h1.pdf]
